# Supplementary material for: Synthesis and Primary Activity Assay of Novel Benitrobenrazide and Benserazide Derivatives
Source: Preprints.org preprint supplement (doi:10.20944/preprints202401.0386.v1), 2024-01-04

Synthesis and Primary Activity Assay of Benitrobenrazide and Benserazide Derivatives.

Karolina Juszczak 1, , Wojciech Szczepankiewicz 1  and Krzysztof Walczak *1

1 Department of Organic Chemistry, Bioorganic Chemistry and Biotechnology, Faculty of Chemistry, Silesian University of Technology, 44-100 Gliwice, Poland; Karolina.Juszczak@polsl.pl, Krzysztof.Walczak@polsl, Wojciech.Szczepankiewicz@polsl.pl

***** Correspondence: Krzysztof.Walczak@polsl.pl

**Supporting Information**

1. Hydrogen bonding interaction in compound **4a S1**
2. NMR spectra of compounds evaluated for inhibition of HK2.**S2-S27**

Figure S1: Hydrogen bonding interaction in compound **4a**


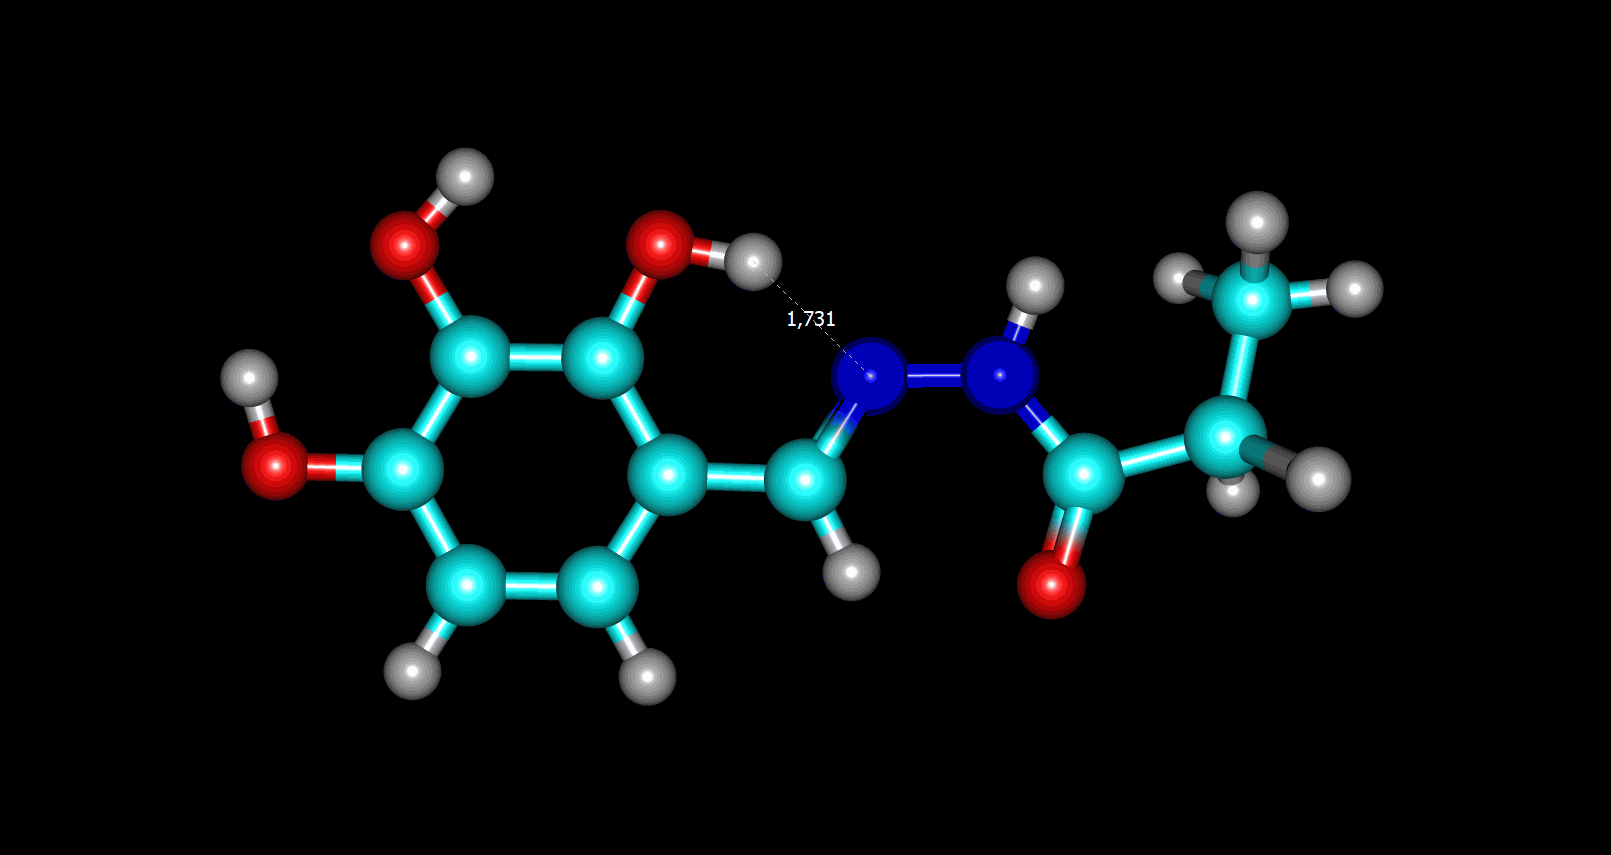


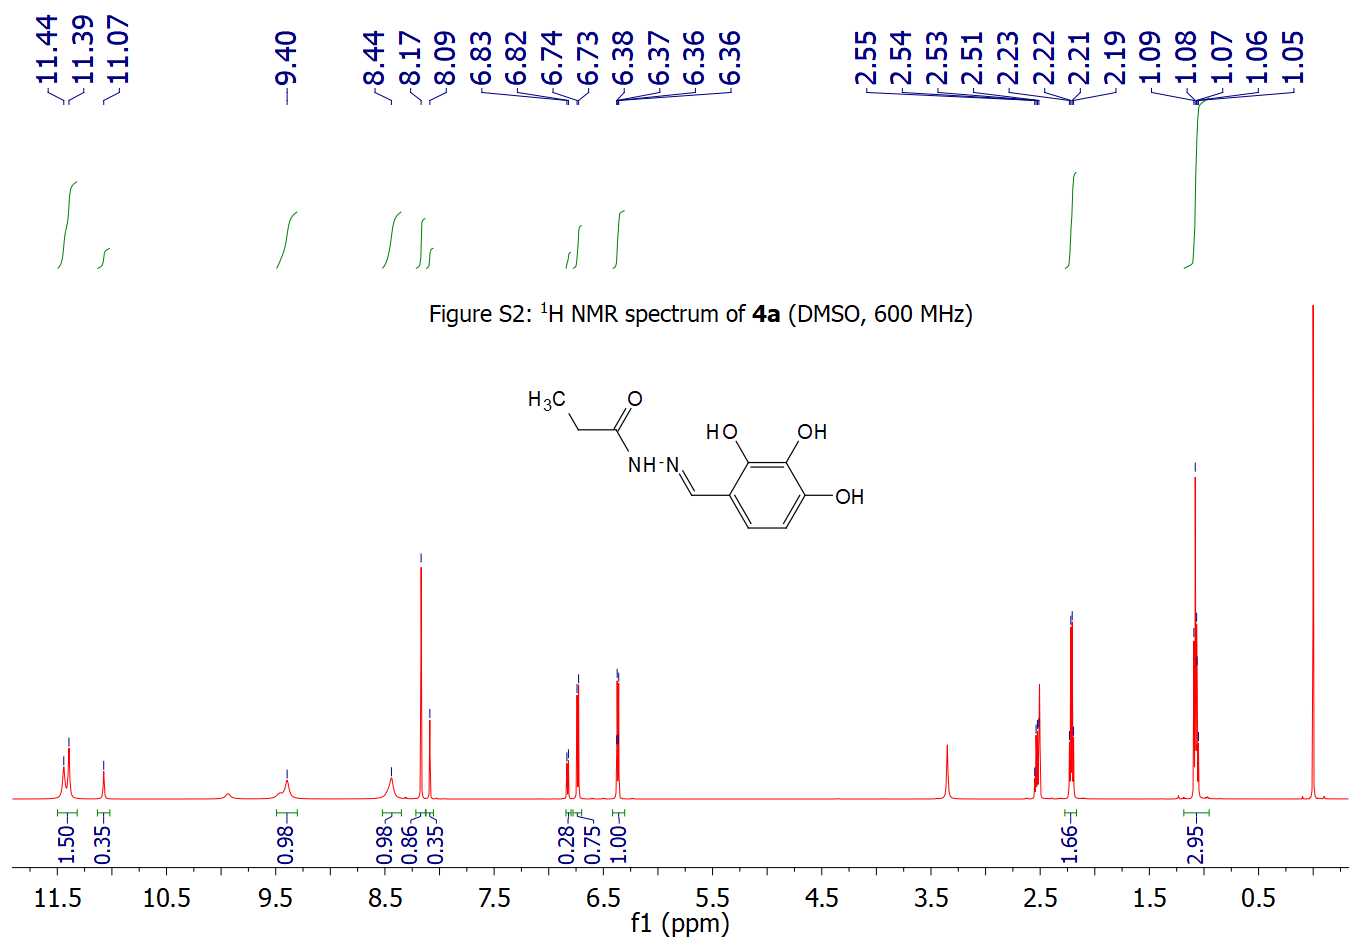


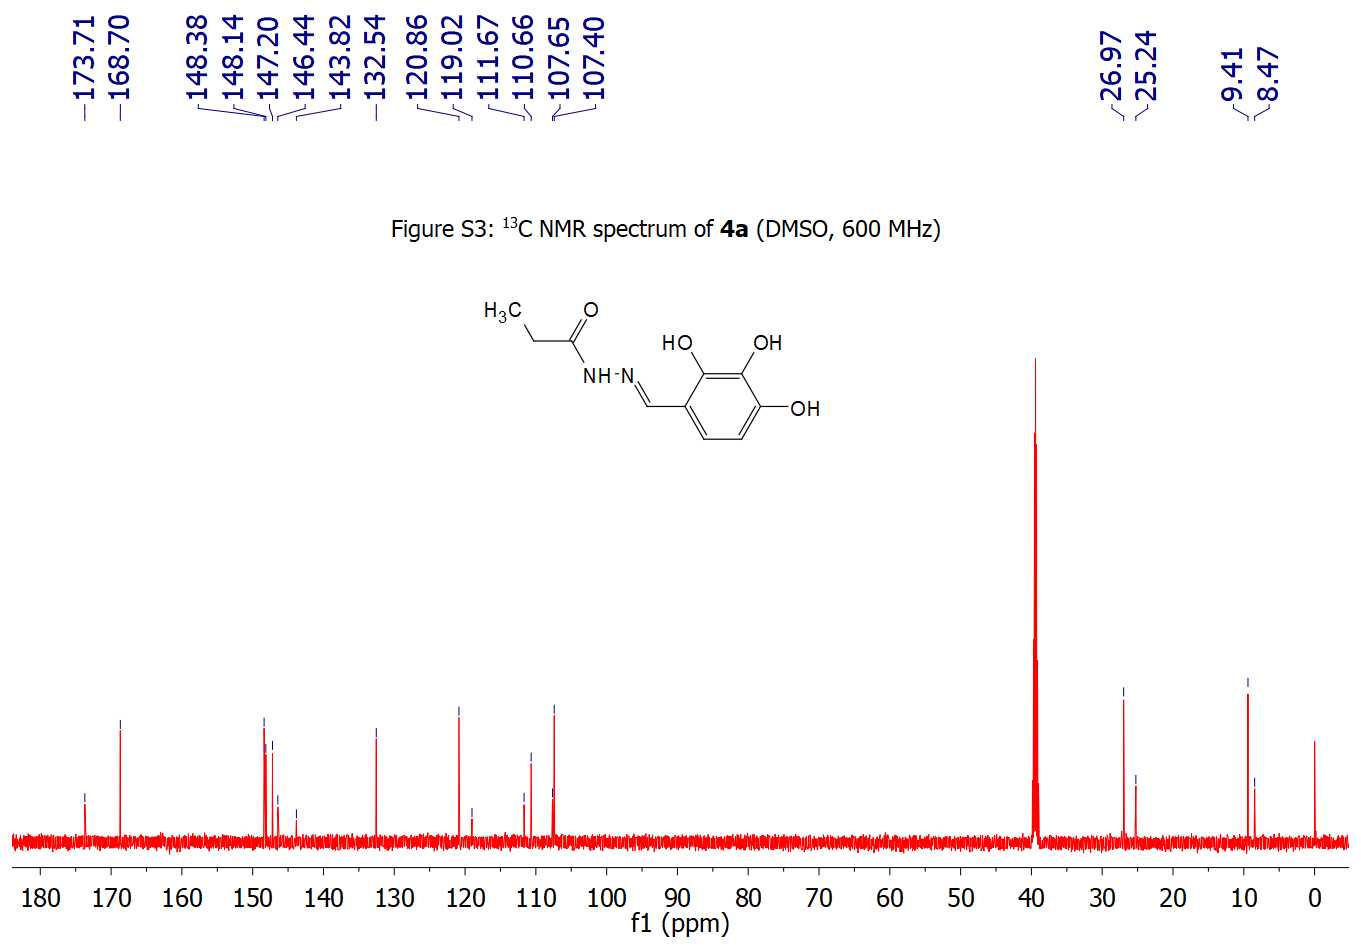


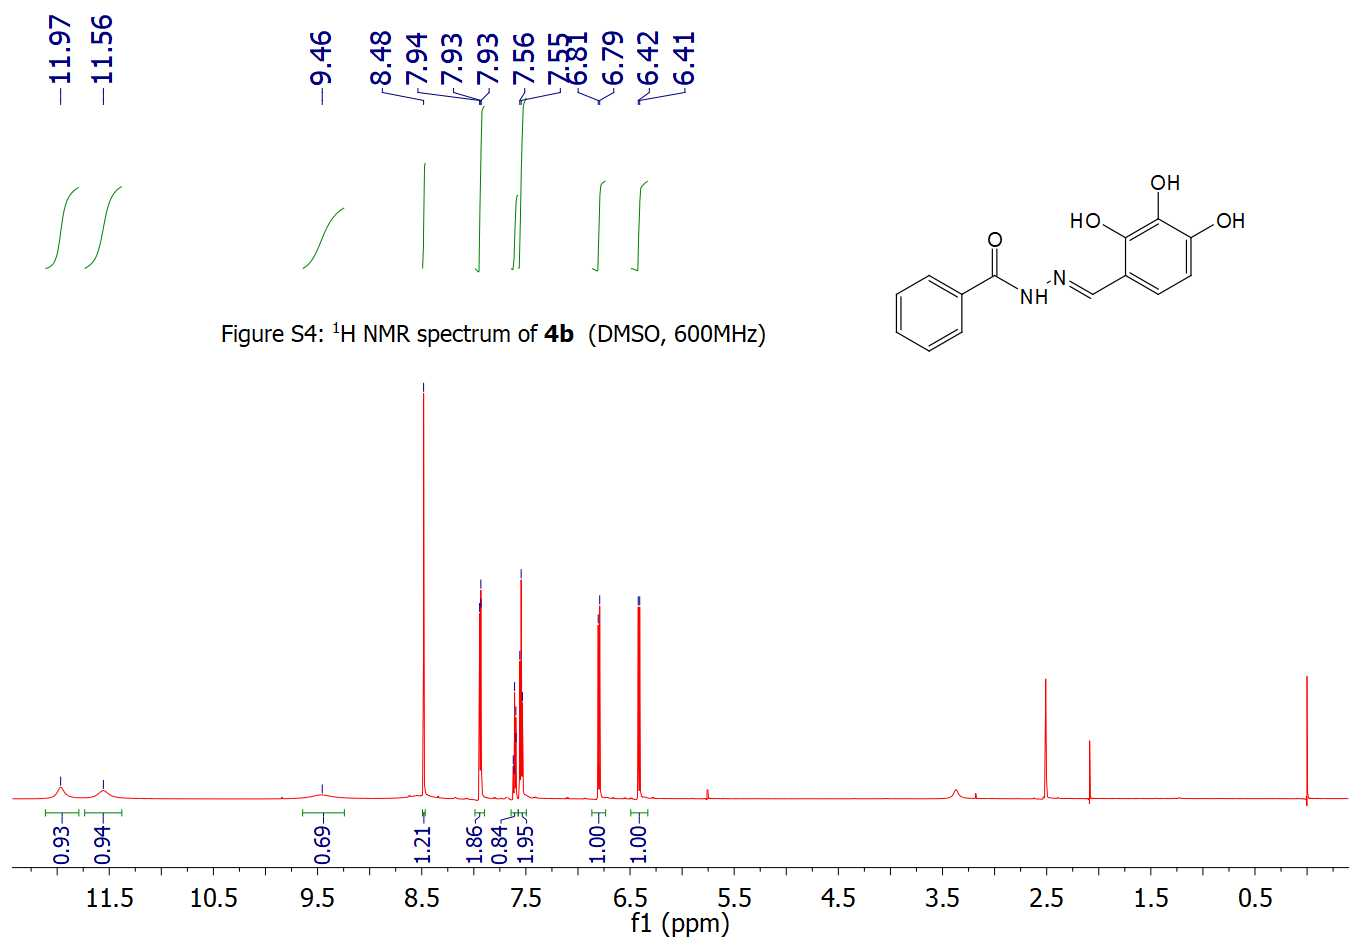


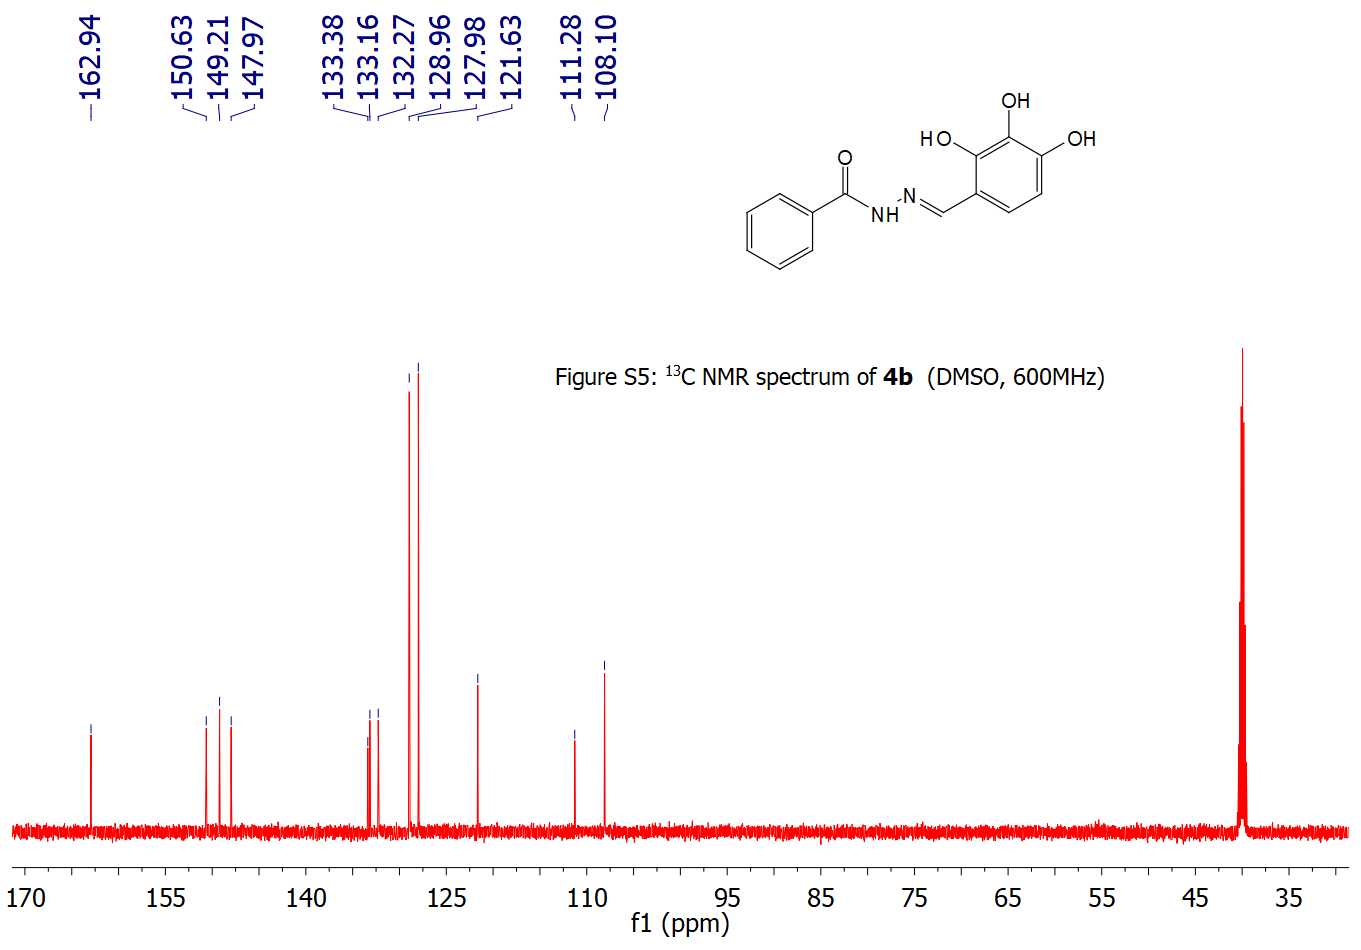


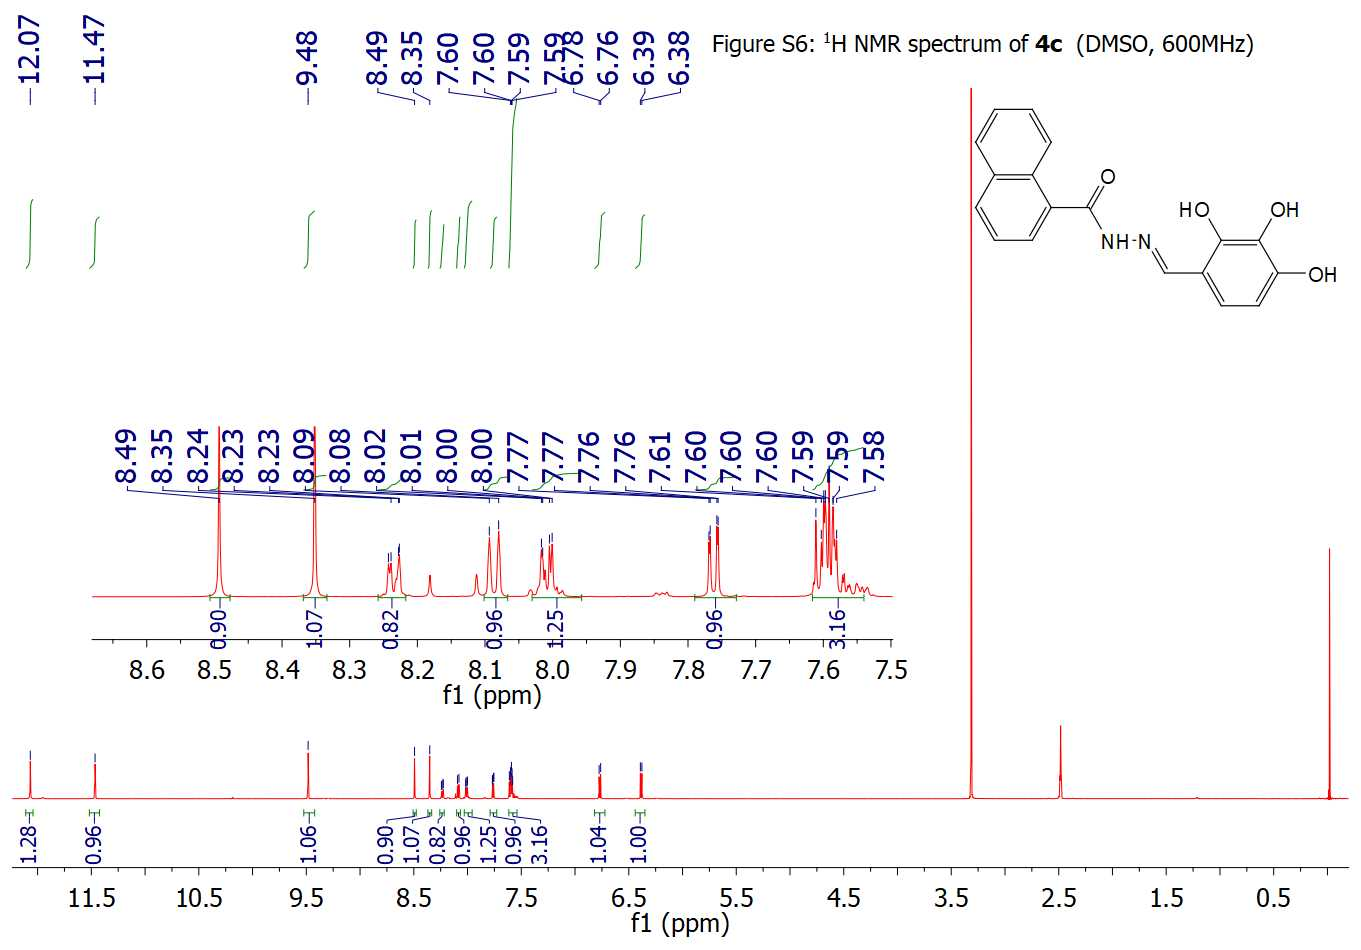


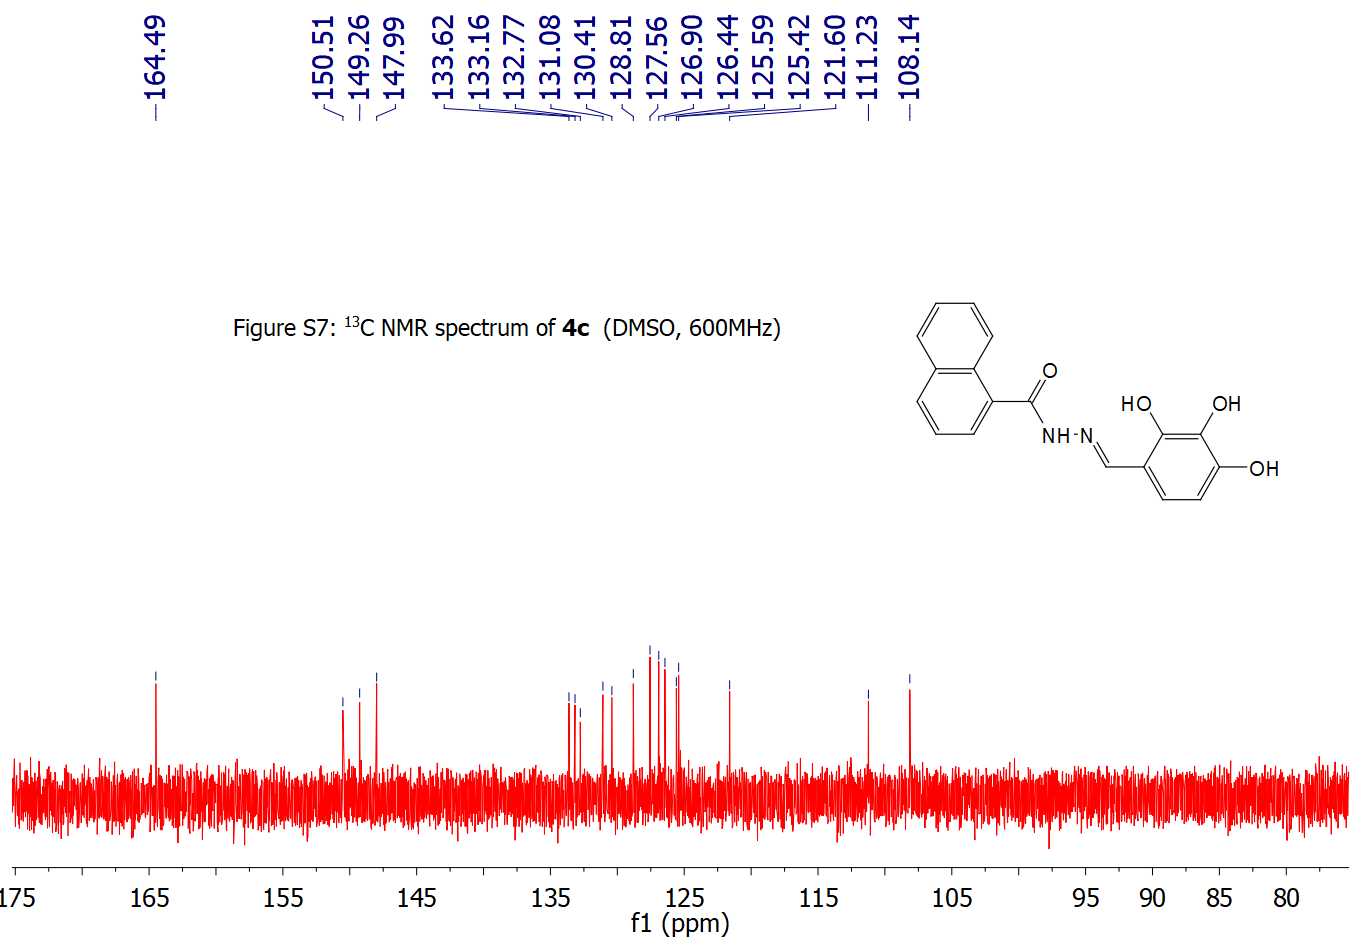


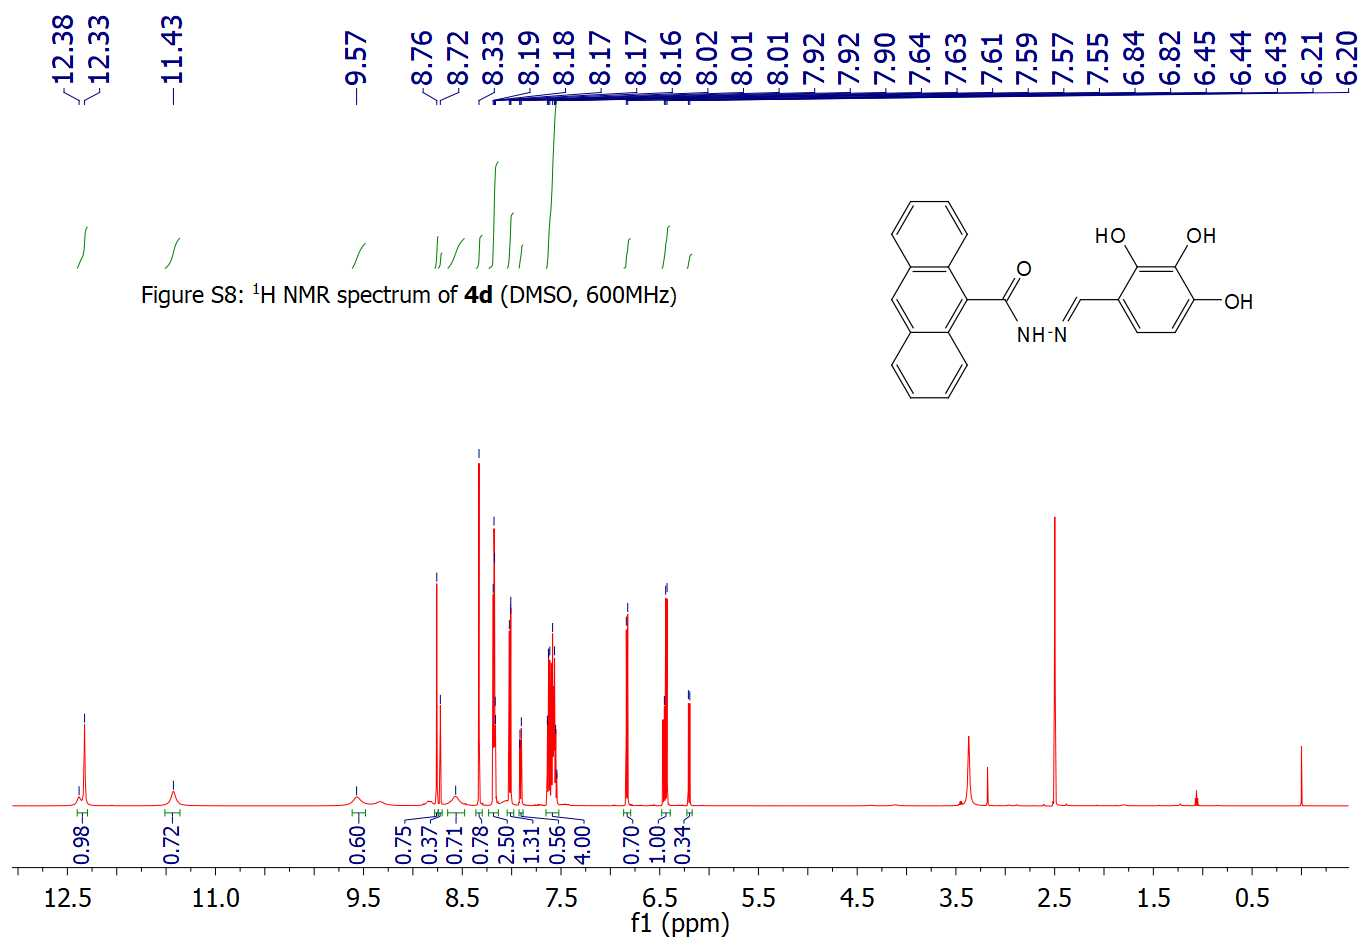


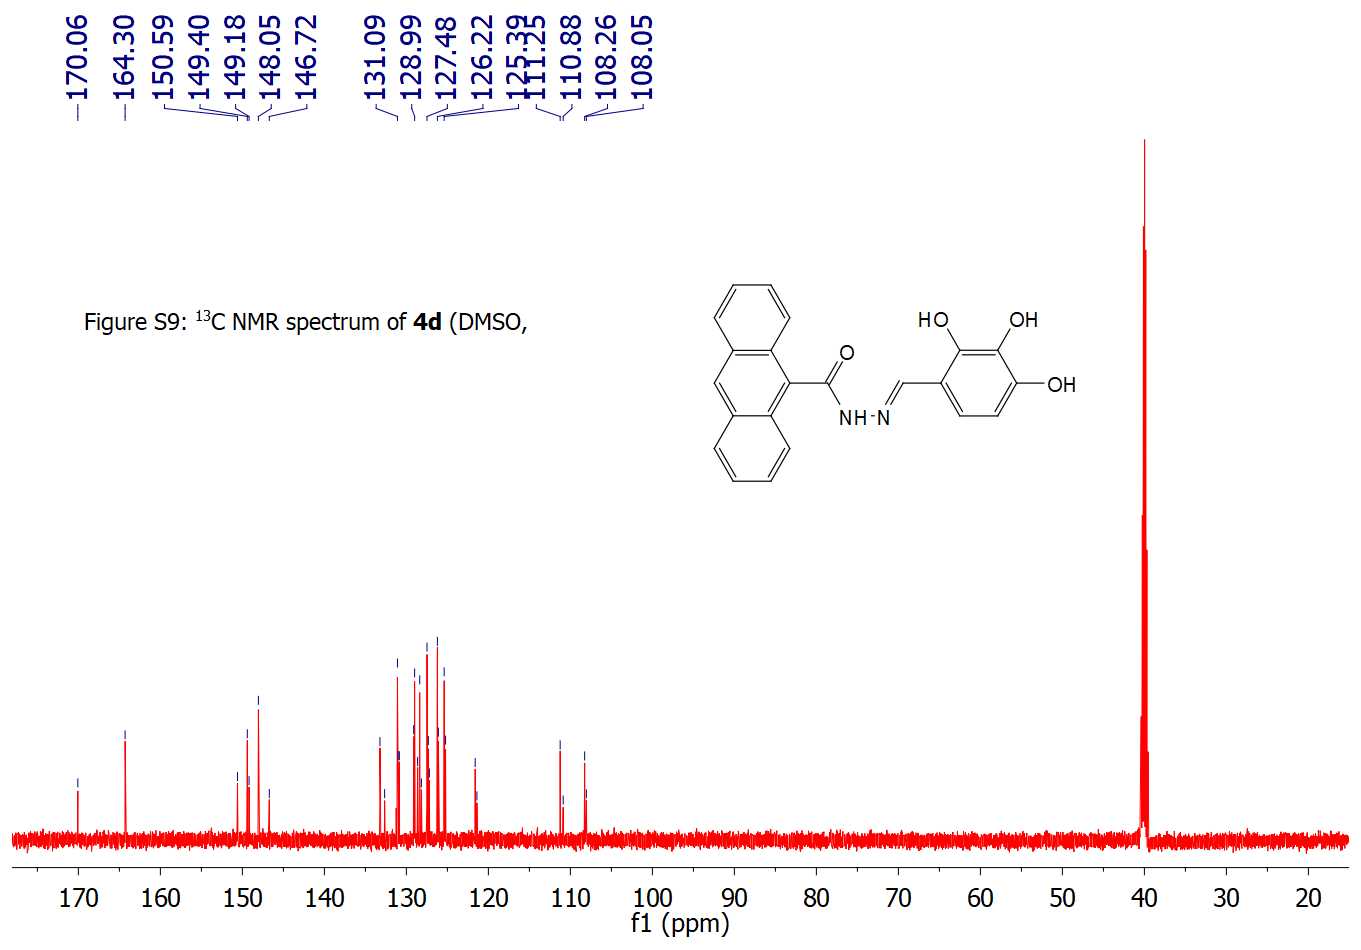


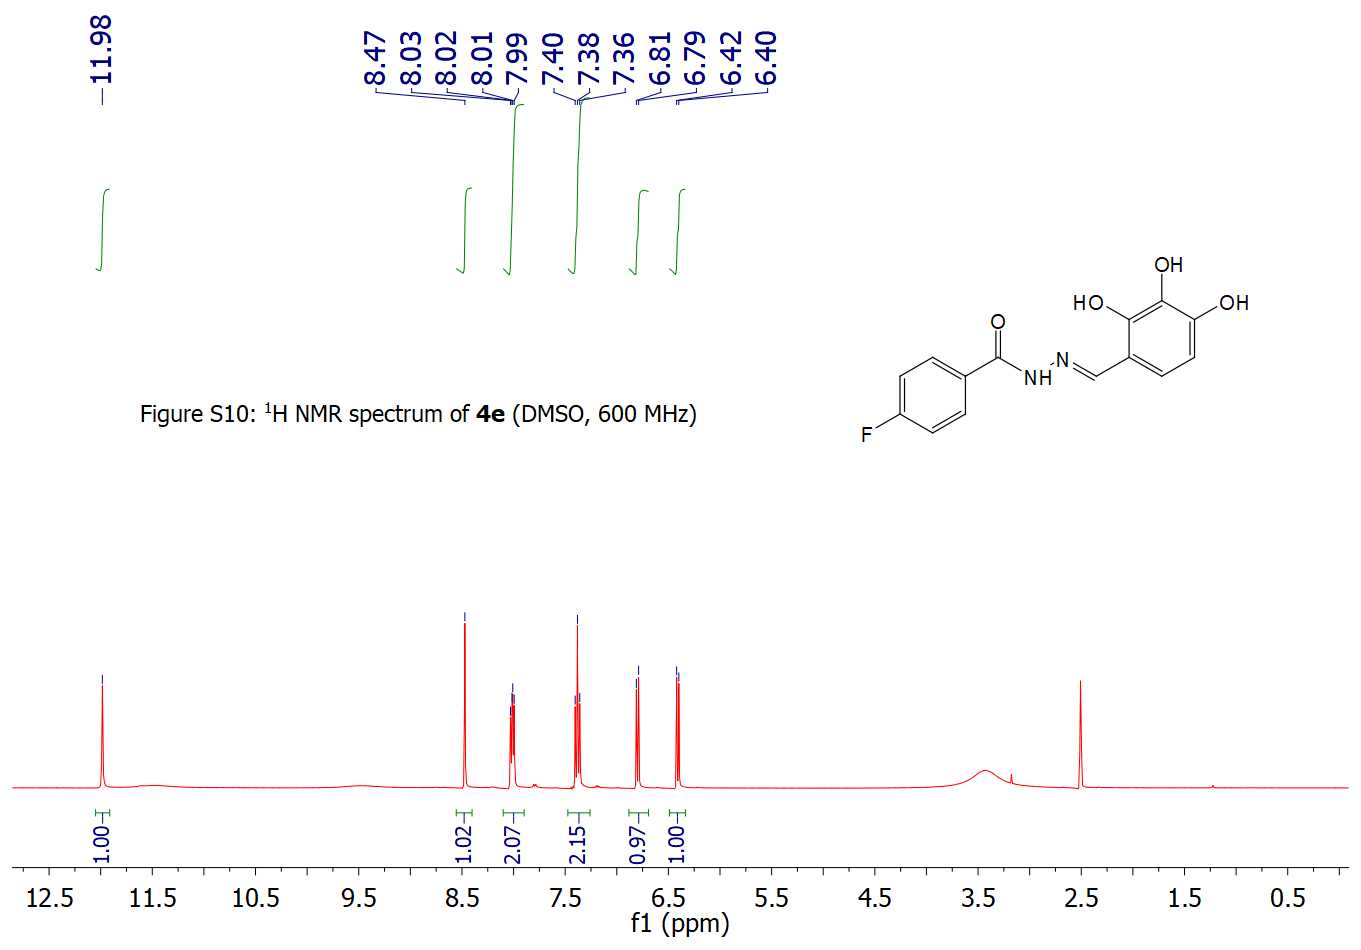


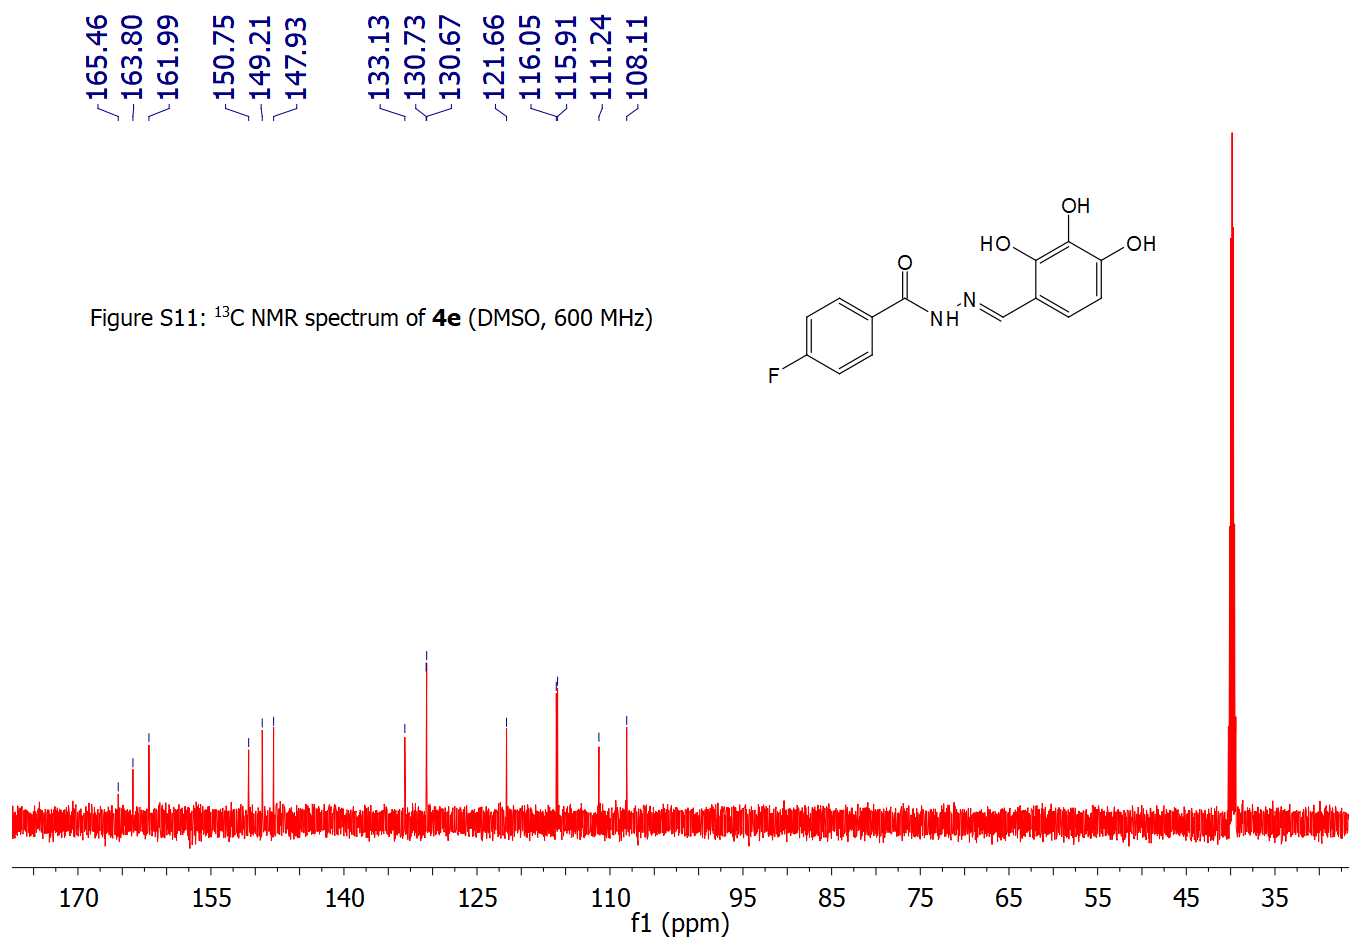


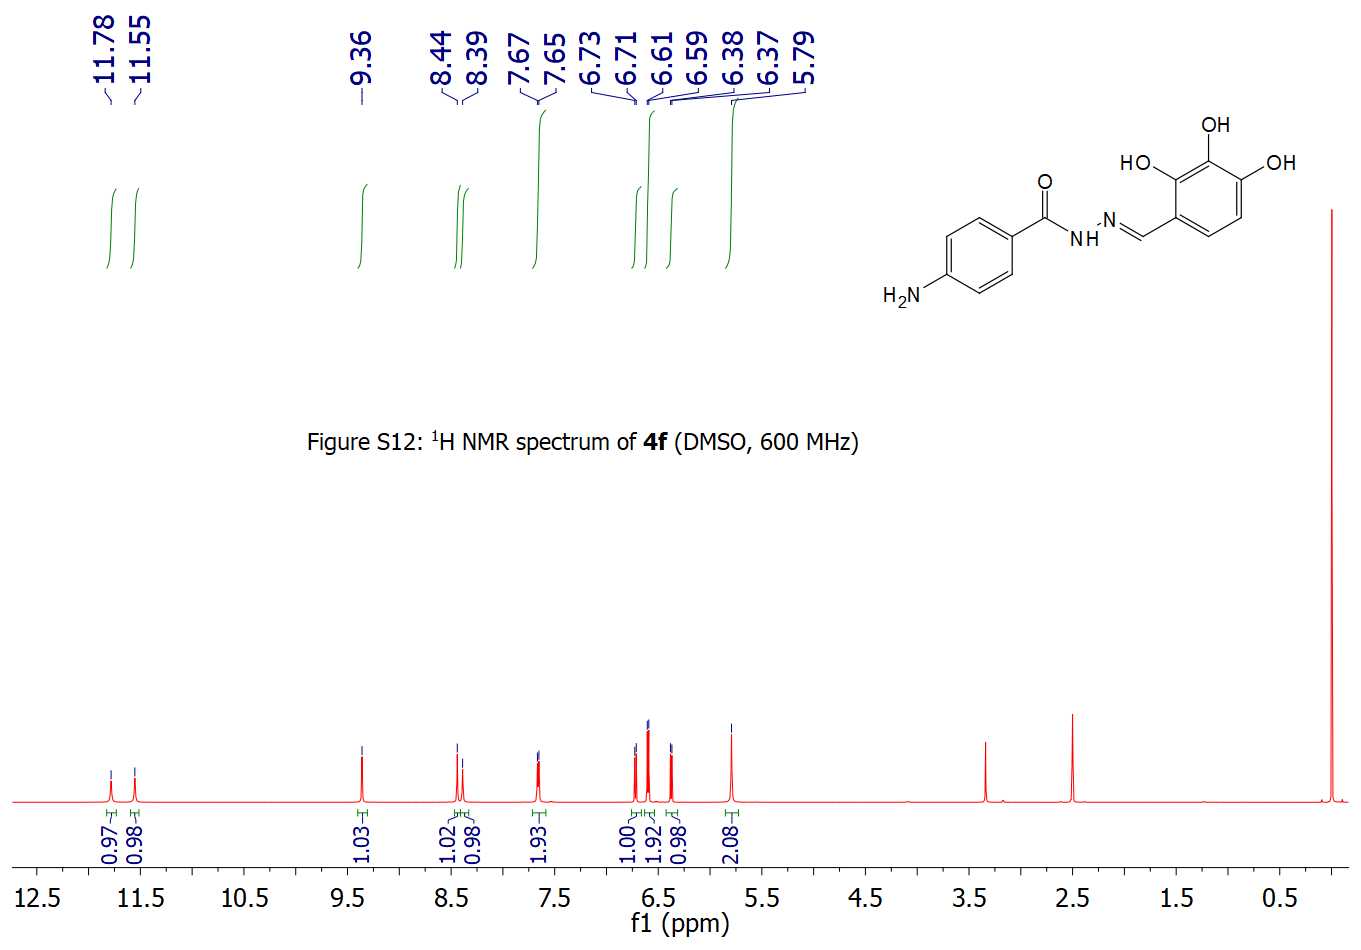


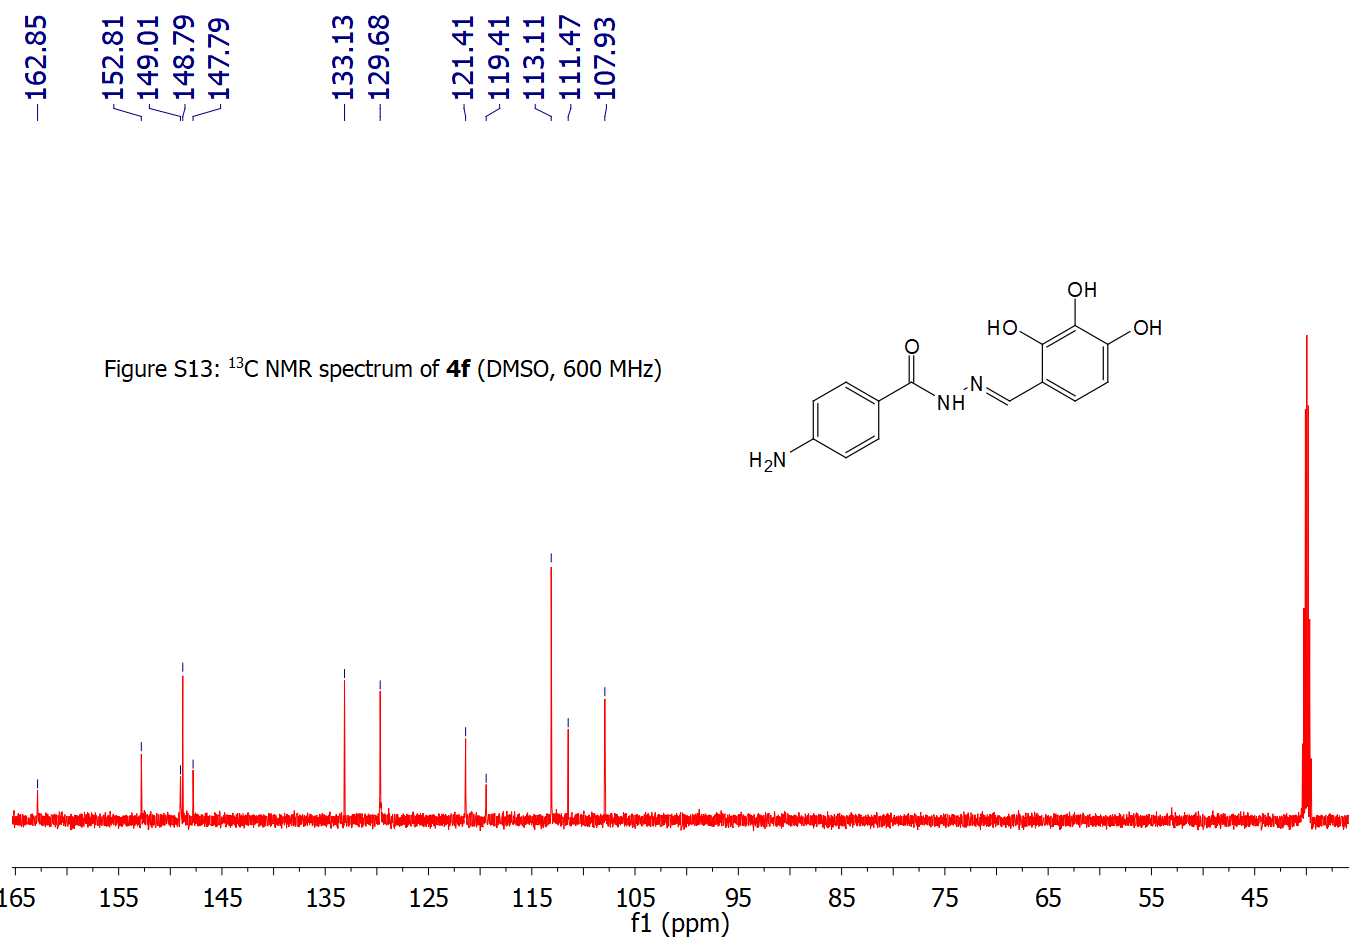


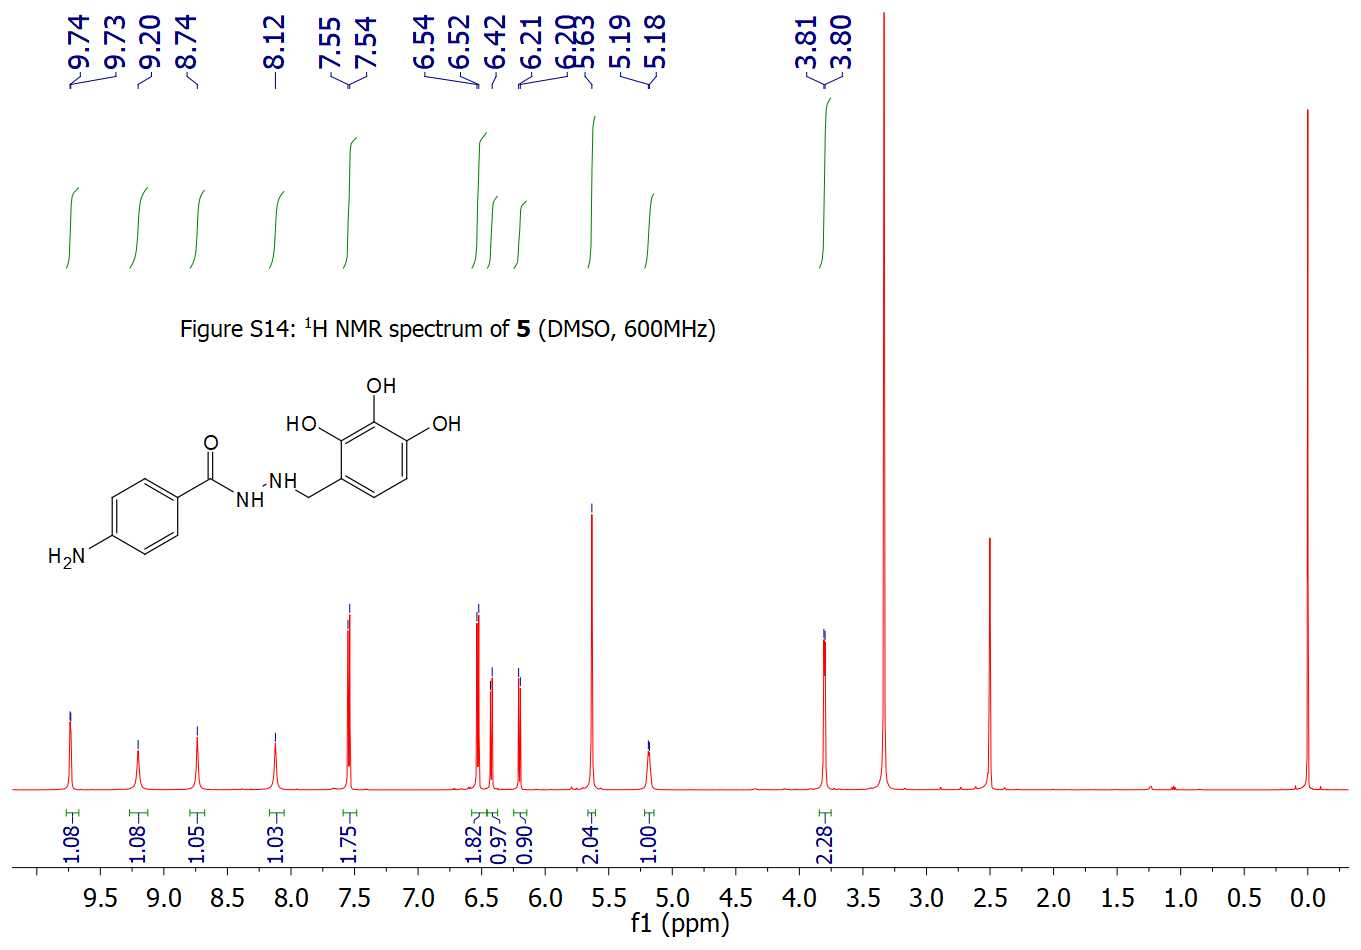


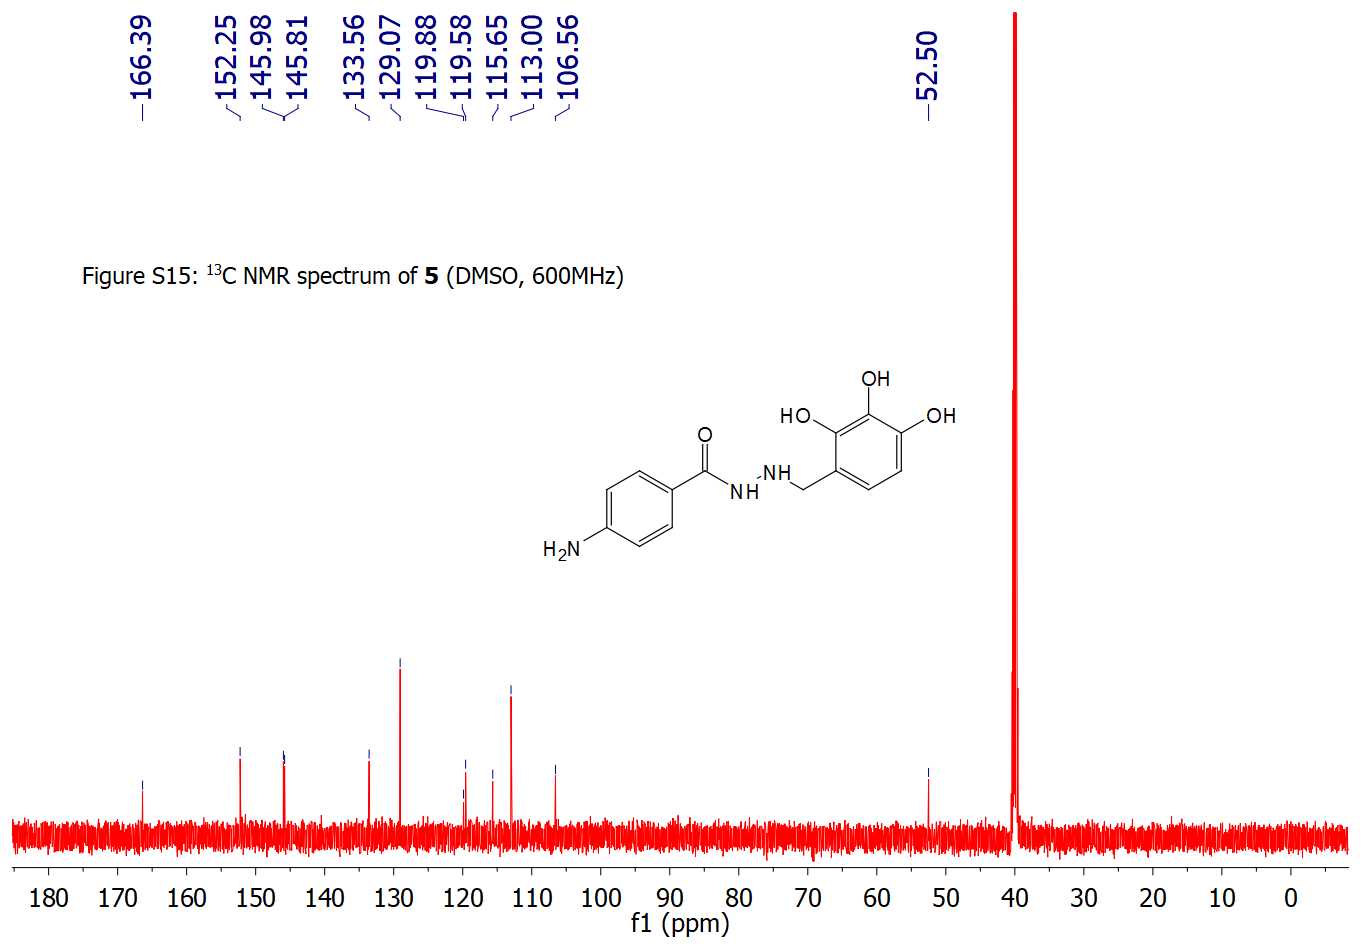


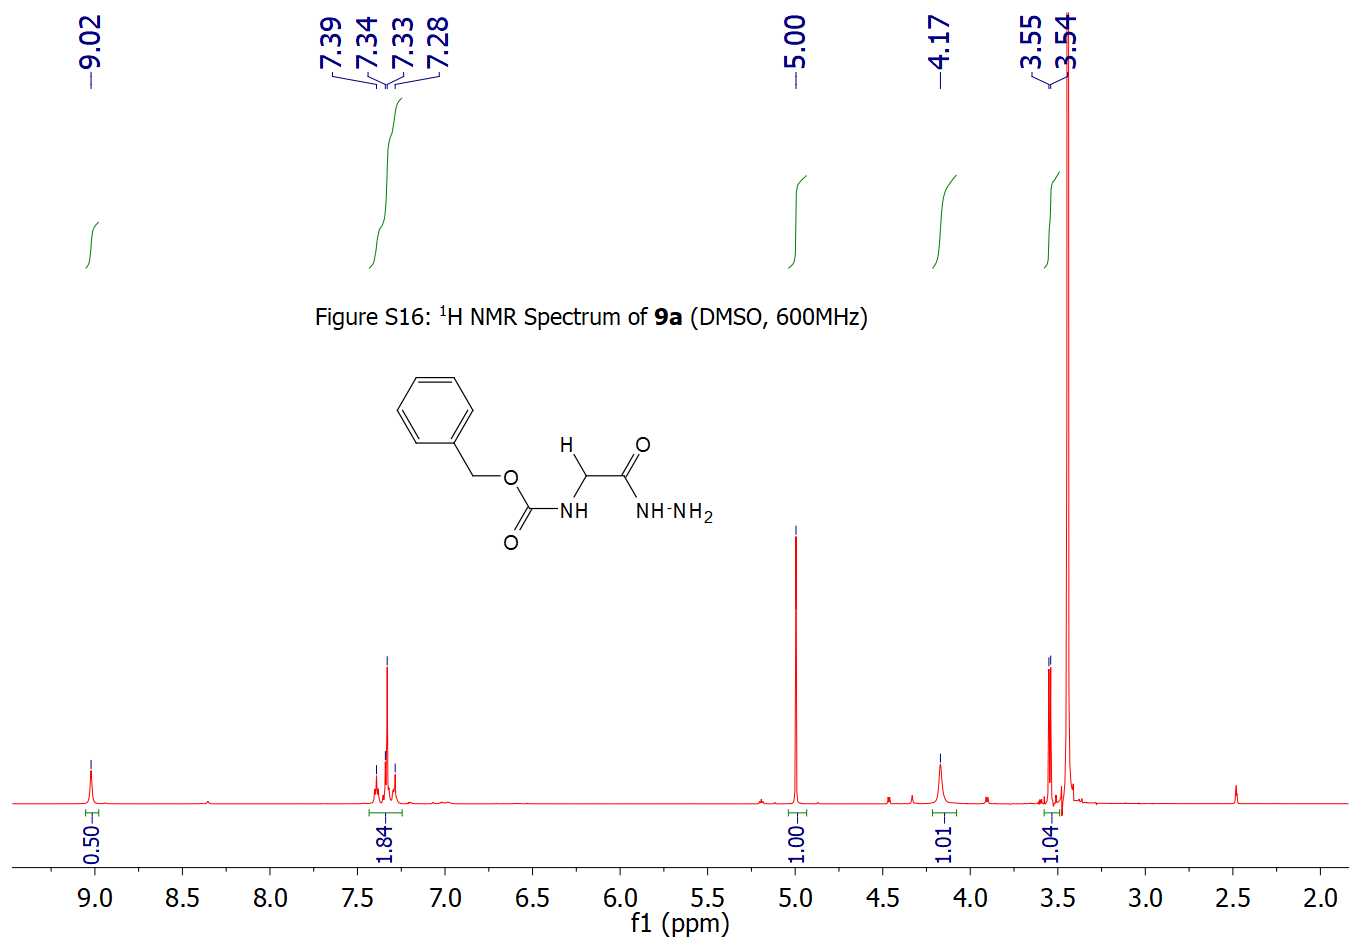


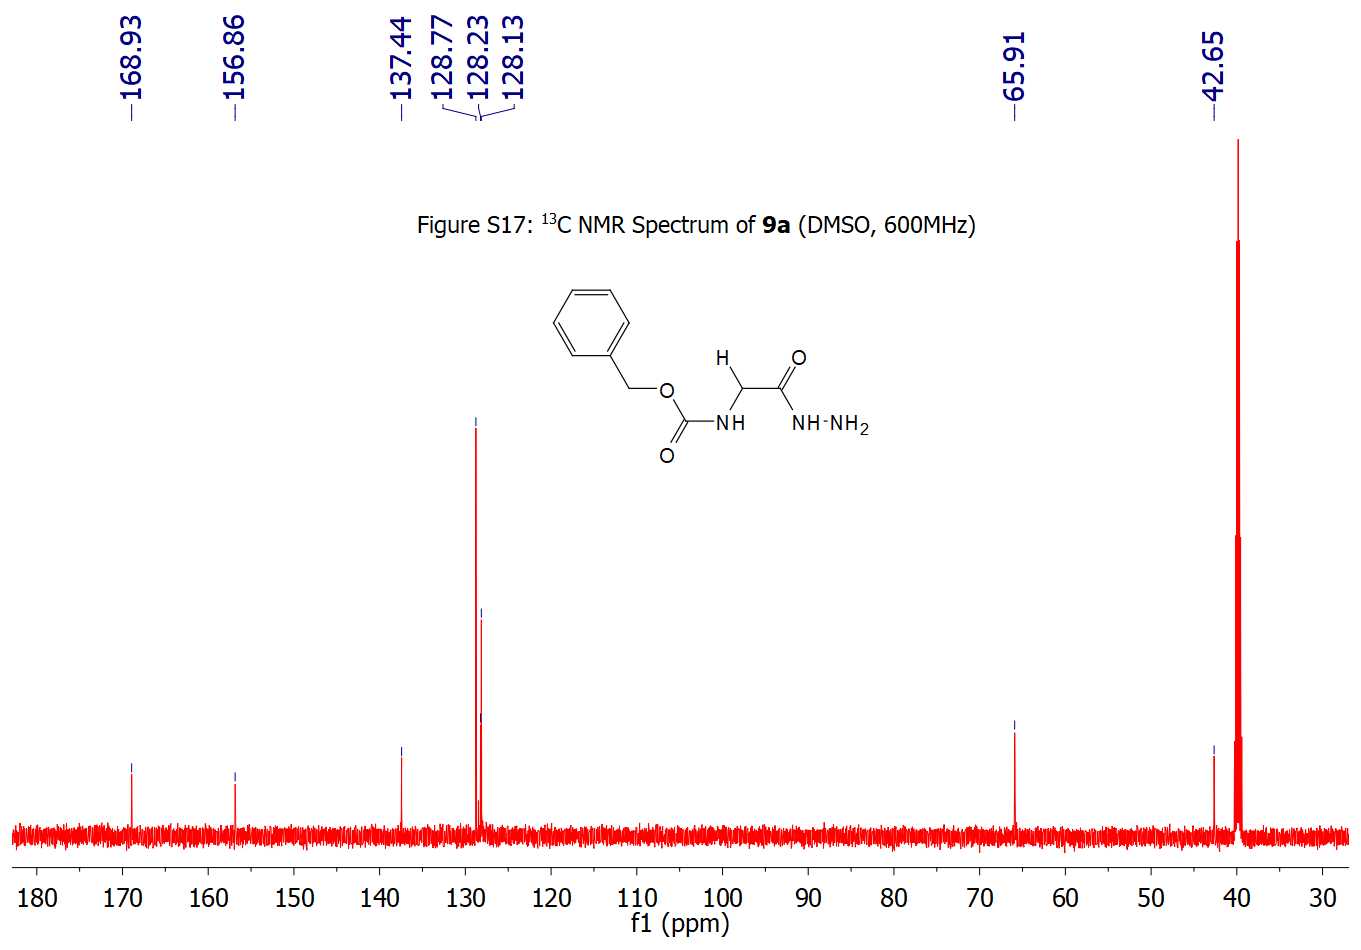


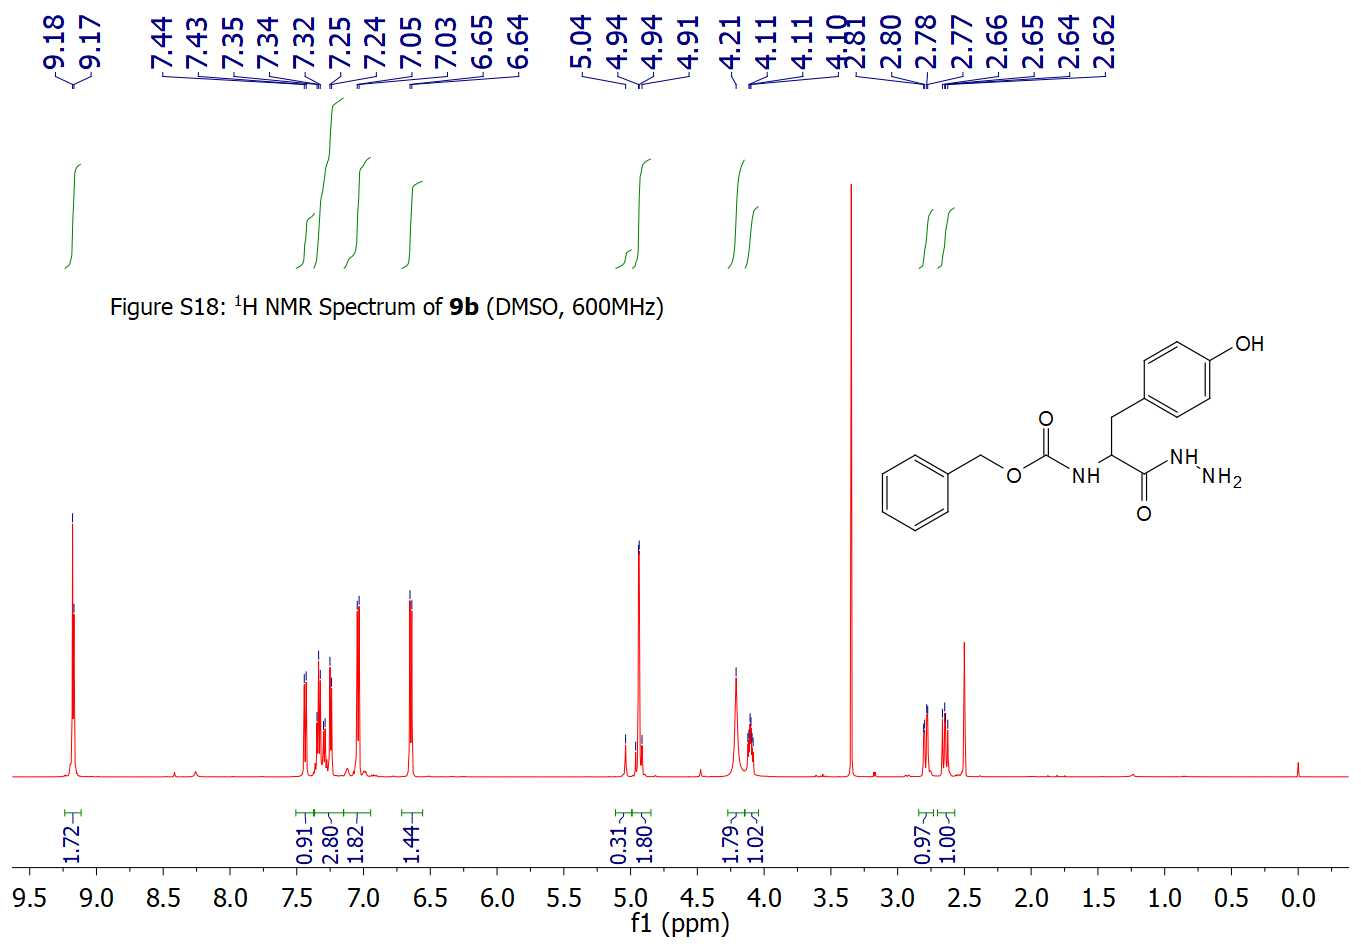


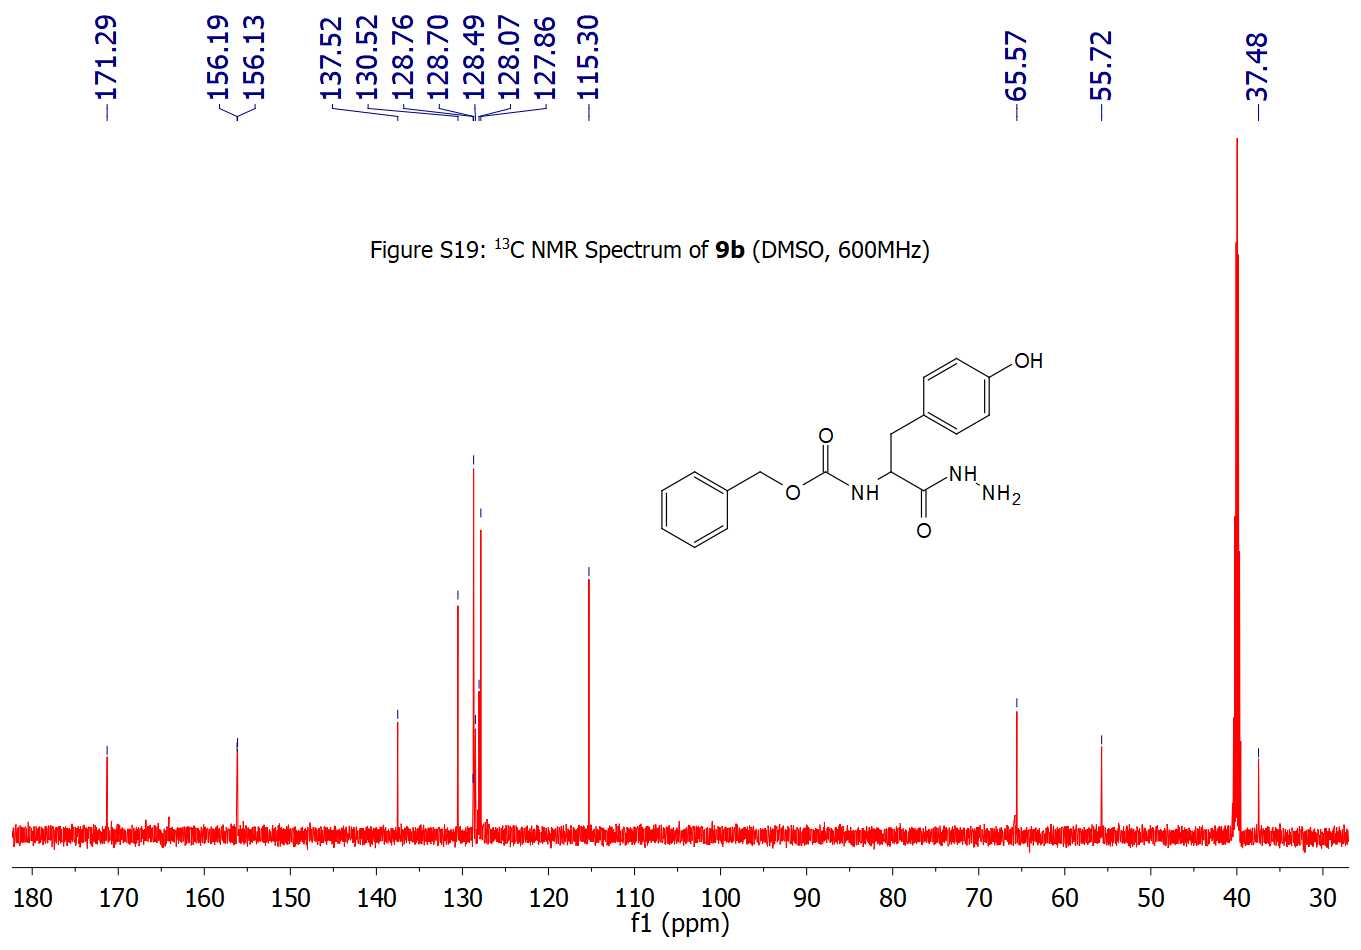


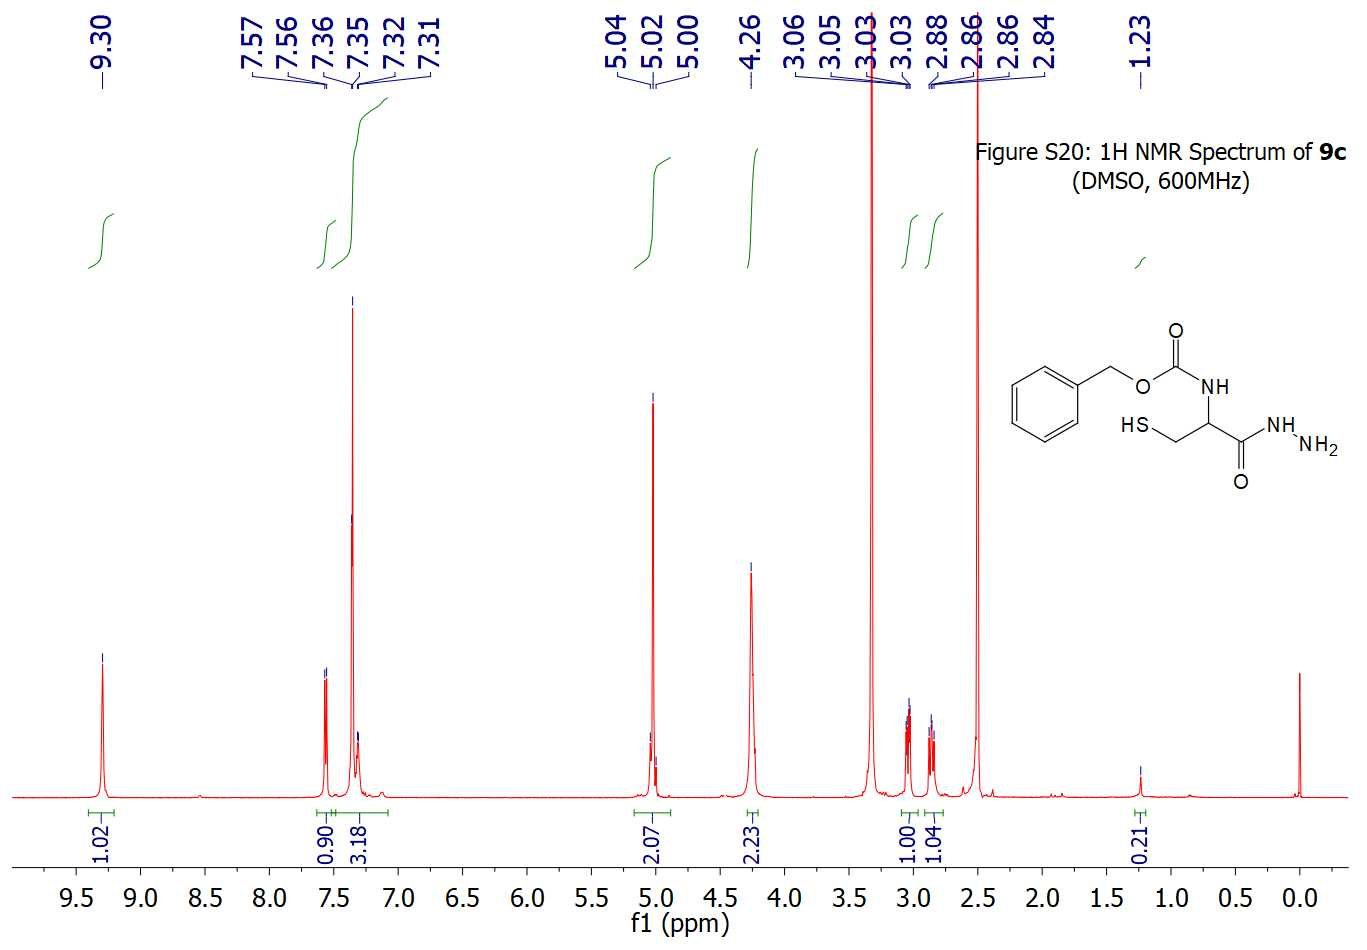


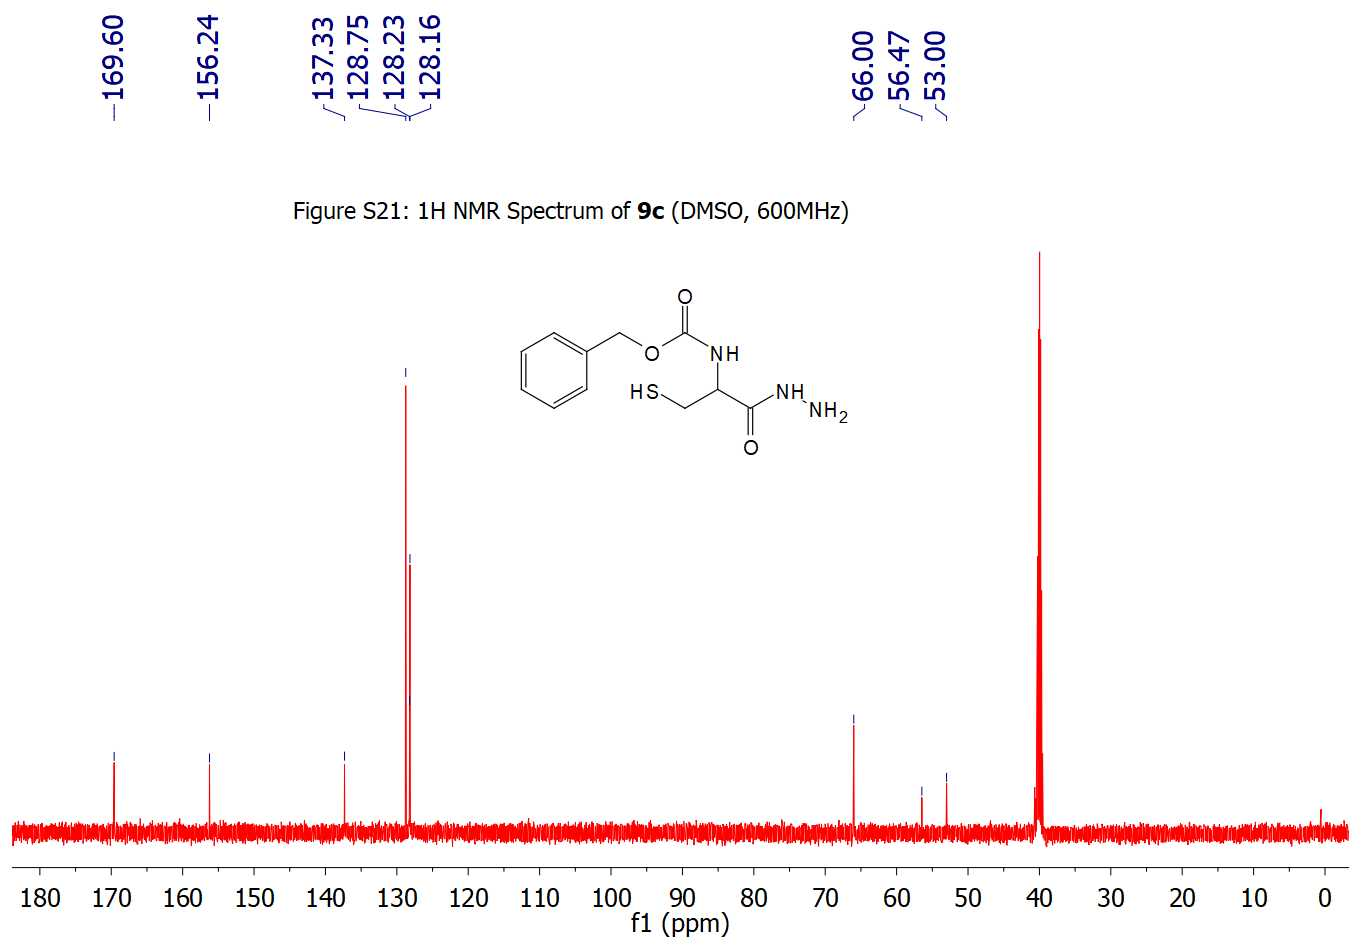


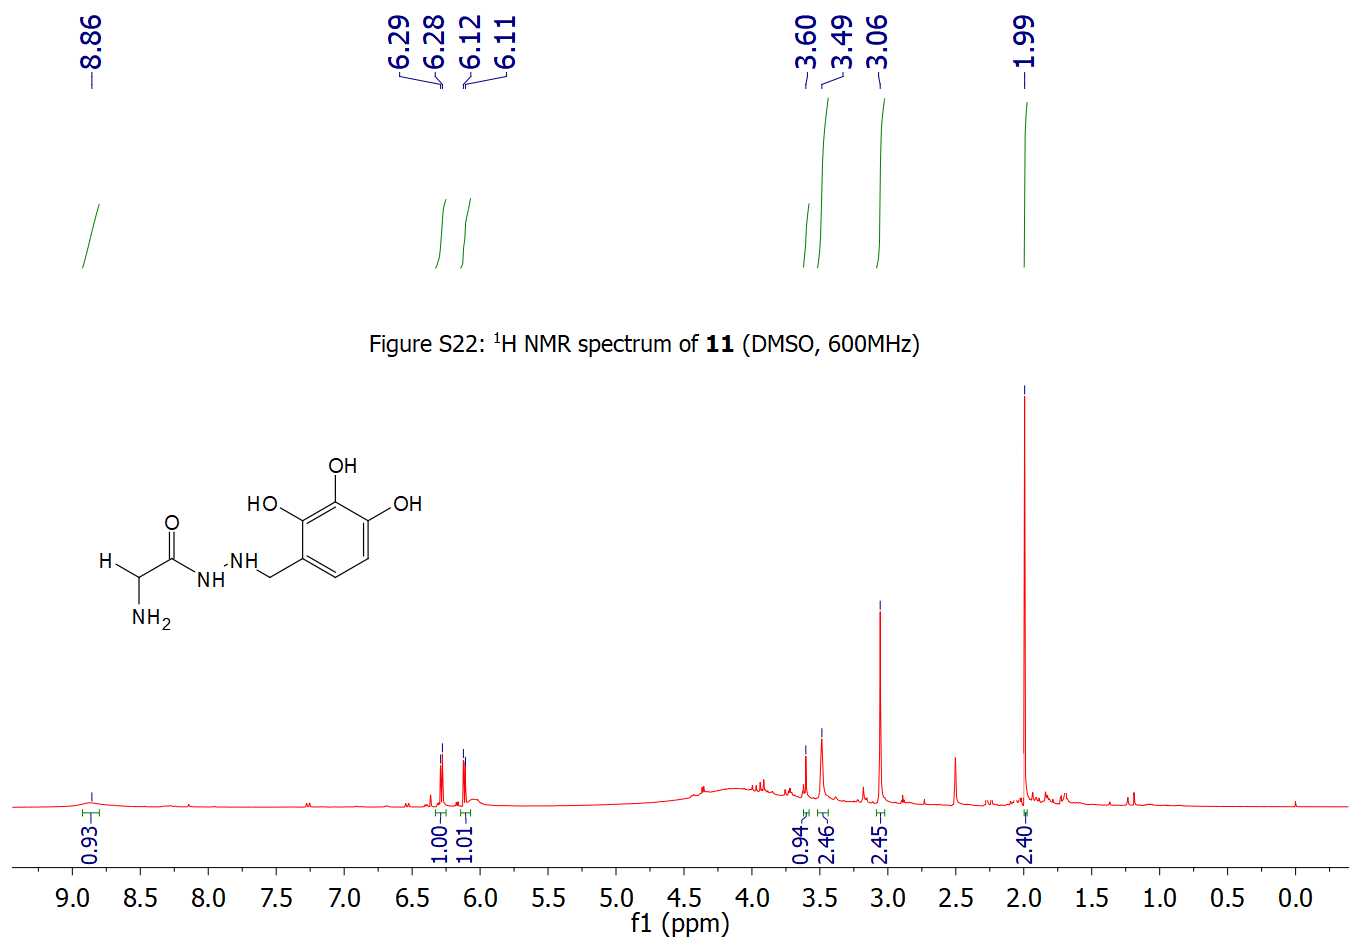


*According to TLC (Thin Layer Chromatography) the compound **11** is pure but probably contains undetectable residual palladium catalyst and water.


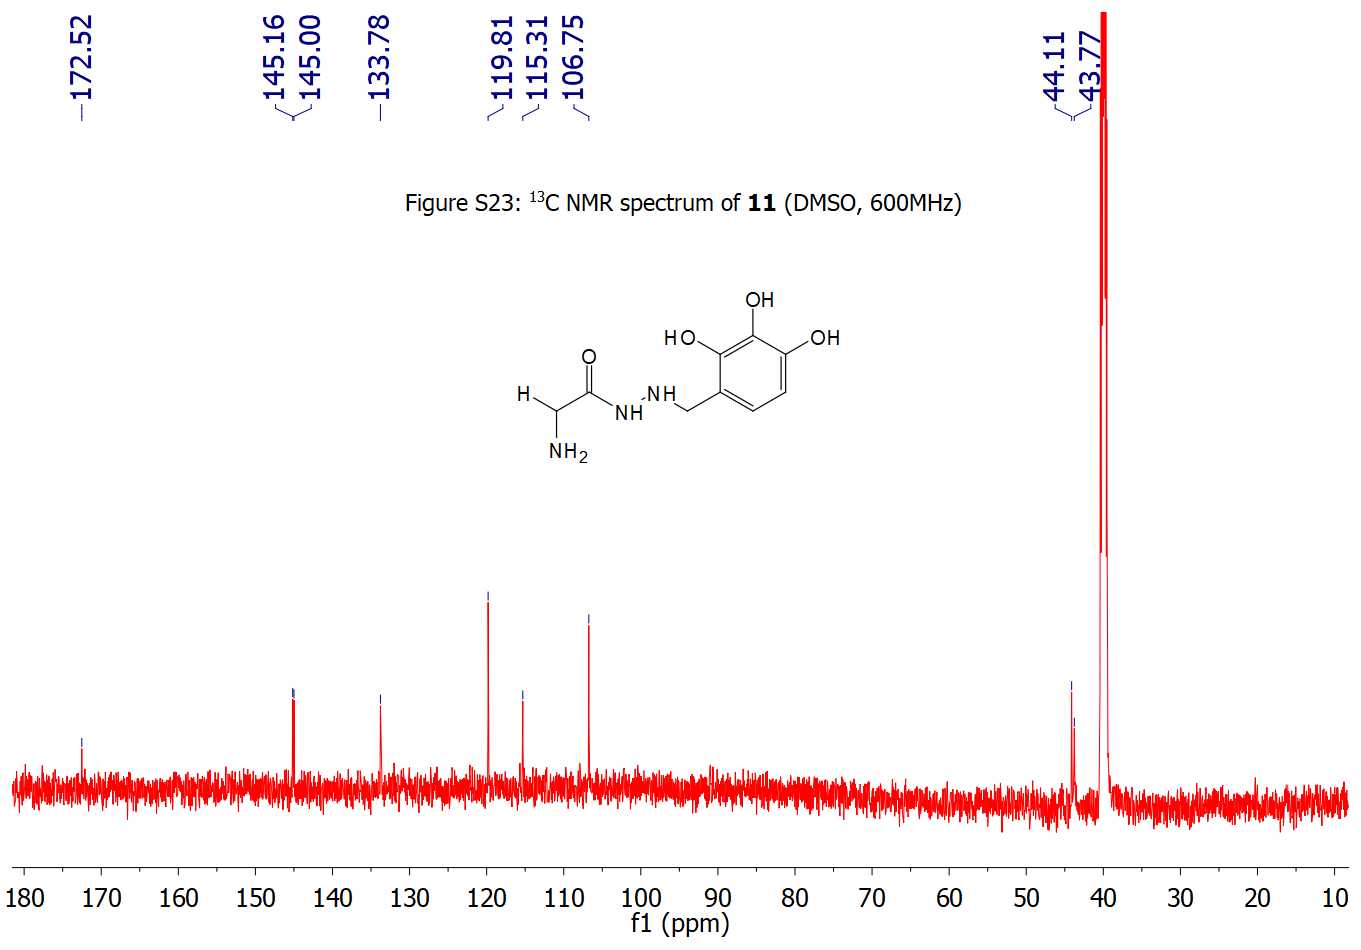


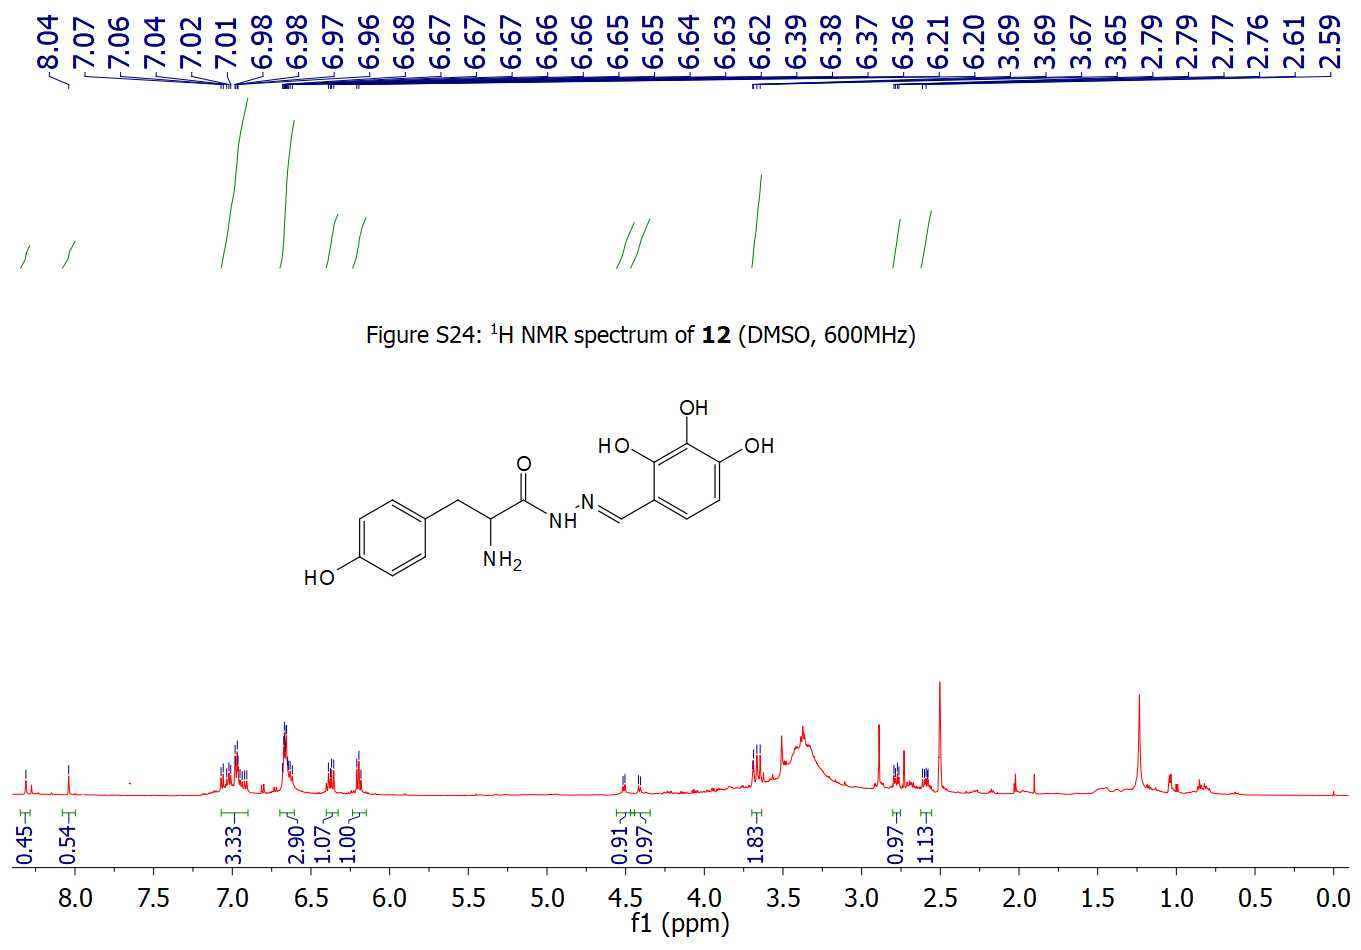


*According to TLC (Thin Layer Chromatography) the compound **12** is pure but probably contains undetectable residual palladium catalyst and water.


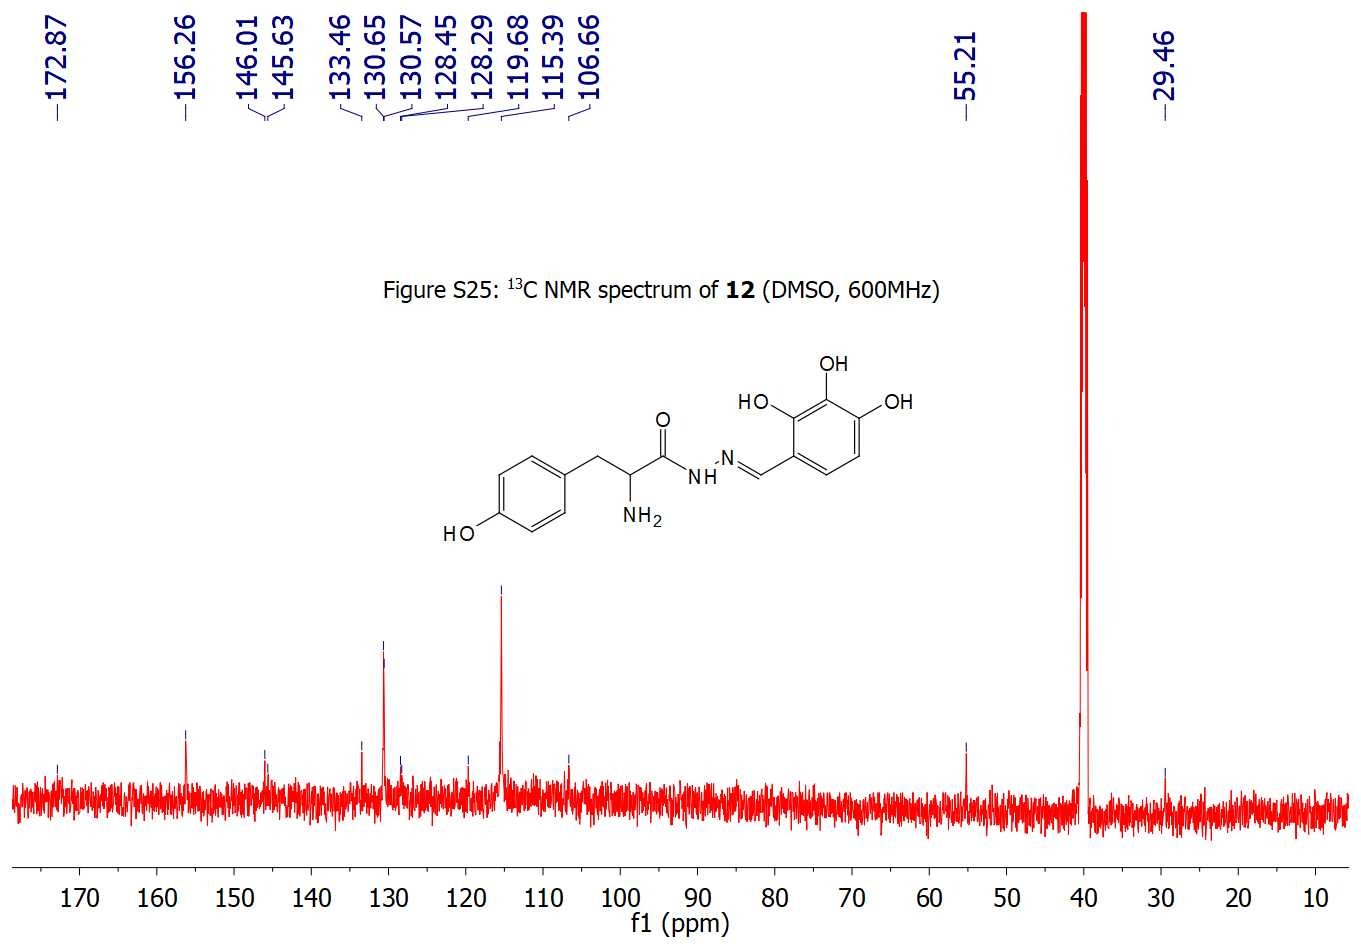


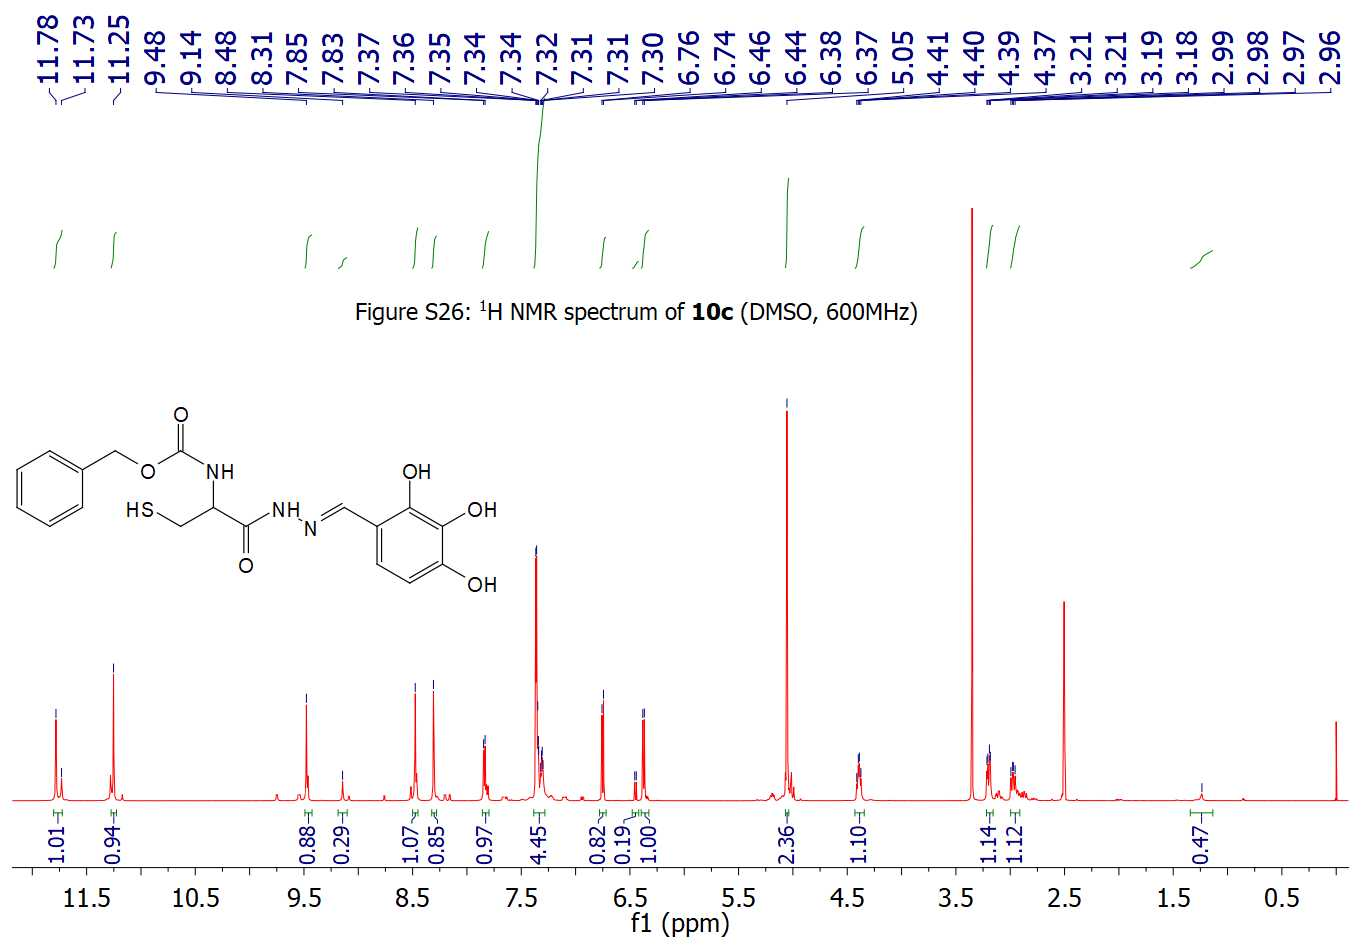


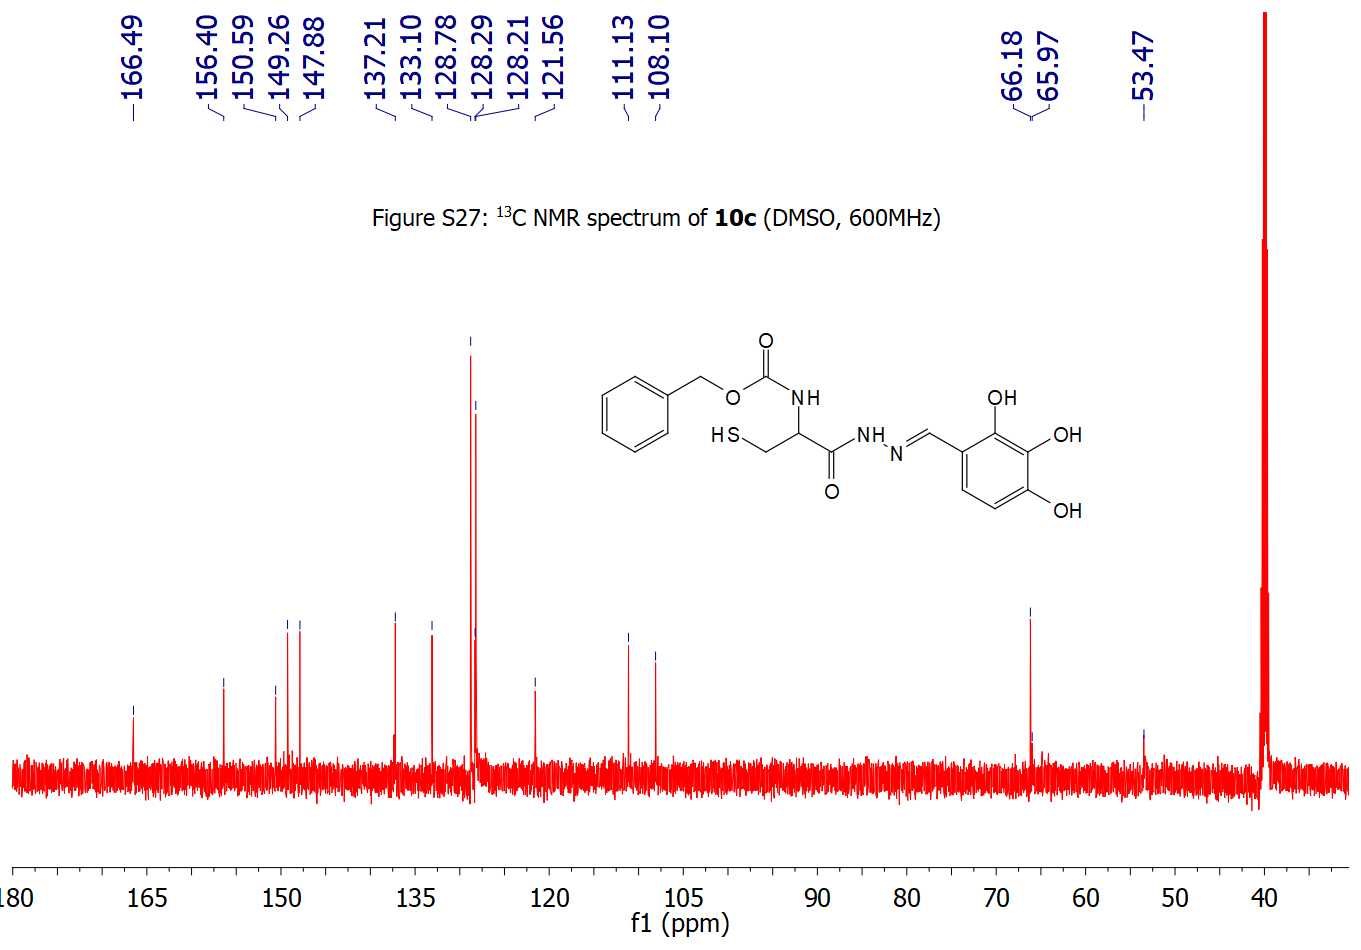

Supplement: Supplementary file 5 [file supplementary]
